# Supplementary material
Source: PubMed Central journal article supplement (PMC7922227)
Supplement: jamapediatr-e206141-s001.pdf [file jamapediatr-e206141-s001.pdf]

1  
2  
3  
4  
5  
6  
7  
8  
9  
10  
11  
12  
13

**Intermittent vs. Continuous Pulse Oximetry in Infants Hospitalized for Bronchiolitis: A  
Randomized Controlled Trial**

**Supplement 1 Protocol Documents**

The protocol documents contain the following documents:

- 1. trial protocol (page 2)
- 2. Summary of changes to the protocol (page 24)
- 3. Statistical Analysis Plan Final with summary of changes (page 25)

14 **Intermittent vs. Continuous Oxygen Saturation Monitoring in Infants Hospitalized for**  
15 **Bronchiolitis: A Randomized Controlled Trial**

16

17 Trial registration: Registered at [www.clinicaltrials.gov](http://www.clinicaltrials.gov) NCT02947204

18

19 Protocol version: December 5, 2019

20

21 Funding: This study is funded through a peer reviewed grant from the Canadian Institutes of  
22 Health Research (CIHR). The funders have no role in the study design; collection, management,  
23 analysis, and interpretation of data; writing of the report; and the decision to submit the report for  
24 publication.

25

26 Principal Investigator:

27 Sanjay Mahant, MD MSc FRCPC, Associate Professor, Pediatric Medicine, Department of  
28 Pediatrics, University of Toronto, Hospital for Sick Children

29 Phone Number: 416-813-5280

30

31 SickKids Co-Investigators:

32 Karen Breen-Reid, RN, BScN, MN, Nursing and Manager, Inter-professional Education, Centre  
33 for Nursing, Hospital for Sick Children

34

35 Mollie Lavigne, NP, Nursing, Risk Management Specialist, SickKids

36

37 Andrew R. Willan, PhD, Biostatistician, Ontario Child Health Research Support Unit (OCHSU),  
38 Senior Scientist, SickKids Research Institute

39

40 Myla Moretti, PhD, Health Economist, OCHSU, SickKids Research Institute

41

42 Suzanne Schuh, MD FRCPC, Professor, Pediatric Emergency Medicine, Department of  
43 Pediatrics, University of Toronto; Senior Scientist, Child Health Evaluative Sciences, Research  
44 Institute, Hospital for Sick Children

45

46 Patricia Parkin, MD FRCPC, Professor, Pediatric Medicine, Department of Pediatrics, University  
47 of Toronto, Senior Scientist, Child Health Evaluative Sciences, Research Institute, Hospital for  
48 Sick Children

49

50 Site Co-Investigators

51 Catherine Pound, MD FRCPC MSc, Pediatric Medicine, Children's Hospital of Eastern Ontario,  
52 University of Ottawa

53

54 Gita Wahi, MD FRCPC, Assistant Professor Department of Pediatrics, McMaster University,  
55 Hamilton

56

57 Luci Giglia, MD FRCPC, Associate Professor, Department of Pediatrics, McMaster University,  
58 Hamilton

59

60 Ann Bayliss, MD FRCPC, Pediatrician, Trillium Health Partners, Mississauga, University of  
61 Toronto

62  
63 Ronik Kanani, MD FRCPC, Pediatrician, Department Chief Pediatrics, North York General  
64 Hospital, University of Toronto

65  
66 Mahmoud Sakran MD, Pediatrician, Lakeridge Health, Oshawa, Queens University

67  
68

69 **Summary**

70 **BACKGROUND** This research protocol focuses on bronchiolitis, a leading cause of infant  
71 hospitalization and cumulative expense for the health care system. Supportive management, such  
72 as oxygen supplementation and monitoring, is the major focus of care, as active medical  
73 treatment is not effective. Oxygen saturation monitoring may be performed on an *intermittent*  
74 (e.g. every 4-6hrs) or *continuous* basis for stable infants hospitalized with bronchiolitis.  
75 Observational studies find that the use of *continuous* monitoring is associated with overuse of  
76 supplemental oxygen and longer hospital stay. Based on this low quality evidence, practice  
77 guidelines state that clinicians may choose not to use continuous monitoring and practice  
78 variation exists due to a lack of RCTs.

79 **SPECIFIC AIMS** Primary: To determine if *intermittent* vs *continuous* oxygen saturation  
80 monitoring will reduce length of hospital stay in infants with bronchiolitis. Secondary: To  
81 determine differences in other outcomes - effectiveness, safety, acceptability, and cost.

82 **METHODOLOGY**

83 Design: multi-centre, pragmatic, parallel group, 1:1, two arm superiority RCT.

84 Population: Previously healthy infants (4 weeks-2 years) hospitalized with bronchiolitis who are  
85 clinically stable, will be recruited from 6 hospitals – 3 children’s hospitals (SickKids, Children’s  
86 Hospital of Eastern Ontario, McMaster Children’s) and 3 community hospitals (North York  
87 General Hospital, Trillium Health Partners, Credit Valley Site, Lakeridge Health).

88 Interventions: Randomization to *intermittent* (every 4hrs) or *continuous* oxygen saturation  
89 monitoring. In keeping with local clinical practice guidelines, CPS and AAP guidelines, an  
90 acceptable oxygen saturation target of  $\geq 90\%$  will be used for both groups.

91 Outcome: Primary: time from randomization to hospital discharge. Secondary: duration of  
92 oxygen supplementation, number of medical interventions, parent anxiety, parental days missed  
93 from work, nursing satisfaction, ICU admissions, unscheduled return to care within 15 days of  
94 discharge, mortality and cost-effectiveness.

95 Sample Size: 210 (105 per group) will provide the power to detect a 12-hour difference in  
96 median length of stay between groups.

97 Analysis: Wilcoxon rank-sum test will compare the median length of stay between groups.

98 **EXPECTED OUTCOMES** This pragmatic RCT will inform the ideal oxygen monitoring  
99 strategy, improve quality of care, reduce inappropriate care and reduce the burden to families.

100

101

102 **BACKGROUND**

103 **Bronchiolitis definition, epidemiology, burden of disease:** Bronchiolitis is an acute lower  
104 respiratory tract infection that affects infants and young children less than 2 years of age  
105 resulting in a viral upper respiratory prodrome followed by tachypnea, chest retractions, and  
106 diffuse crackles, wheeze, or both.<sup>1</sup> Pathologically it is characterized by small airways  
107 inflammation and edema. Bronchiolitis is caused by infection with seasonal viruses, most  
108 commonly respiratory syncytial virus (RSV).<sup>2</sup> This acute viral illness is self-limited, however  
109 infants may experience significant distress during the illness due to cough, fast and laboured  
110 breathing, irritability and feeding difficulties.<sup>3</sup>

111 Epidemiologic studies have shown that bronchiolitis is common, associated primarily with short  
112 term morbidity, high health care resource utilization and low mortality.<sup>1,4</sup> About one third of  
113 infants less than 2 years develop bronchiolitis, and of these, one in ten require hospitalization.<sup>1,5</sup>  
114 It is the most common lower respiratory tract infection in infants and, in developed countries, it  
115 is a leading cause of infant hospitalization. Risk factors associated with bronchiolitis-related  
116 morbidity and hospitalizations include premature birth (< 36 weeks gestation), pre-existing  
117 cardio-respiratory disease, neurologic disease, immunosuppression, and younger age (< 6 weeks  
118 old).<sup>6</sup> Of all infants hospitalized with bronchiolitis, approximately 3% will require pediatric  
119 intensive care unit (PICU) admission, and, of those without risk factors, less than 1% will require  
120 PICU admission.<sup>7,8</sup> In-hospital mortality is very low, estimated at 0.03% in all infants  
121 hospitalized with bronchiolitis and 0.01% in those without risk factors. *Thus, poor outcomes in*  
122 *otherwise healthy infants hospitalized for bronchiolitis are very uncommon.*

123 **Bronchiolitis hospital inpatient management:** Management of bronchiolitis includes both  
124 *active medical treatment* and *supportive management*. Clinical practice guidelines (CPG) from  
125 the American Academy of Pediatrics (AAP) and Canadian Pediatric Society (CPS) for the  
126 diagnosis and treatment of bronchiolitis were published in 2014.<sup>1,12</sup> Recent meta-analyses of the  
127 large body of evidence [randomized clinical trials (RCTs)] have shown evidence of minimal  
128 effectiveness for a range of *active medical treatments*, specifically drug therapies including  
129 steroids and inhaled bronchodilators.<sup>13-17</sup> Thus, the focus of inpatient management is on  
130 *supportive management* which includes monitoring vital signs and hemoglobin oxygen  
131 saturation, oxygen supplementation for hypoxia, and nutritional and/or fluid supplementation  
132 through nasogastric feeds or intravenous fluids for inadequate feeding by mouth.

133 **Local standard of care for inpatient management bronchiolitis:** At the proposed study  
134 centres, The Hospital for Sick Children (SickKids), the Children's Hospital of Eastern Ontario  
135 (CHEO), McMaster Children's Hospital, North York General Hospital (NYGH), Trillium Health  
136 Partners, Credit Valley site and Lakeridge Health, Oshawa the recommended management of  
137 bronchiolitis is in keeping with these guidelines. Specifically, routine diagnostic studies (i.e.  
138 chest x-rays, blood cultures, blood gases, nasopharyngeal swabs for viral identification) and  
139 pharmacotherapy (i.e. steroids, scheduled bronchodilators, antibiotics) are not recommended.  
140 Standardization of care (local guidelines and/or physician order sets) supporting these practices  
141 exists at the study centres (see Appendix 1 Care Map).

142 **Oxygen saturation monitoring:** Over the past two decades, noninvasive oxygen saturation  
143 (SpO<sub>2</sub>) monitoring (called pulse oximetry) has become widely available; it has become common  
144 clinical practice to utilize oxygen saturation monitoring in the initial assessment of acutely ill  
145 patients.<sup>18</sup> Pulse oximetry measures oxygenation by determining absorbance of infrared light  
146 through tissues and thereby estimating the saturation of oxygen in blood.<sup>18,19</sup> A pulse oximetry  
147 probe is placed on a patient's finger or toe. The results of pulse oximetry readings are used by

148 clinicians to determine the need for further investigations, therapies, and supplemental oxygen  
149 therapy. For hospitalized patients, oxygen saturation monitoring can be performed using  
150 intermittent (e.g. readings obtained for 2 minutes at intervals of 4-6 hours) or continuous (e.g.  
151 readings displayed continuously at the patient's bedside monitor) strategies.

152 Oxygen saturation monitoring was introduced into bronchiolitis care without health technology  
153 assessment. For infants with severe acute illness (i.e. ICU admission, severe respiratory distress,  
154 apnea) continuous oxygen saturation monitoring is used; however, for infants hospitalized with  
155 less severe illness both strategies are used. Common nursing practice includes documenting the  
156 oxygen saturation level at routine intervals (for example, every four hours) along with other vital  
157 signs (heart rate, respiratory rate, blood pressure and temperature). For this reason, oxygen  
158 saturation level has been termed the 'fifth vital sign'.<sup>19</sup> In addition, the nurse may be notified of  
159 low oxygen saturation levels through an alarm and/or paging system. Furthermore, the child's  
160 parents are able to view the continuous digital display of the oxygen saturation level, and hear  
161 the alarms. It is not known whether parents' experiences with continuous oxygen monitoring are  
162 associated with reassurance or anxiety.

163 Normal values for oxygen saturation in infants and children have not been clearly established  
164 due to a lack of robust data in infants of all ages.<sup>18</sup> Oxygen saturation levels vary with age and  
165 altitude. In healthy infants and children, mean oxygen saturation values at sea level have been  
166 reported to be 97-99% (-2SDs, 95-96%) and might be lower in neonates and young infants  
167 (range: 93-100%).<sup>18</sup> Furthermore, there is a fluctuation in oxygen saturation during a 24 hour  
168 period in children, independent of whether the child is awake or asleep, with maximal values  
169 occurring in the late afternoon and minimal values appearing in the first morning hours. A study  
170 of healthy infants and children at home has shown normal ranges of oxygen saturation to be  
171 between 95-100%.<sup>23</sup> However, normal saturation nadirs can be as low as 84-86%.<sup>20-23</sup>

172 Establishing 'ideal' oxygen saturation targets has been challenging given the rarity of poor health  
173 outcomes associated with too much or too little oxygen in the treatment of healthy stable infants  
174 with bronchiolitis; this contrasts from oxygen therapy in other populations. The AAP guideline  
175 for bronchiolitis suggests using a target saturation of 90%. A subsequent UK trial, found that  
176 management of hospitalized infants with bronchiolitis to a 90% target saturation or higher was as  
177 safe and effective as one a 94% target saturation or higher.<sup>24</sup>

178 **Oxygen saturation monitoring and supplementation as a determinant of length of**  
179 **hospitalization:** Using a retrospective observational study design, Unger et al. studied 102  
180 infants hospitalized with bronchiolitis and showed that oxygen supplementation is the prime  
181 determinant of the length of hospitalization for infants with bronchiolitis, even when other  
182 symptoms, such as feeding difficulties have resolved.<sup>25</sup> The mean age of this population was 24  
183 weeks and mean length of stay 72 hours (range: 6 to 371 hours). Continuous oxygen saturation  
184 monitoring was used and supplemental oxygen was discontinued when oxygen saturation levels  
185 were greater than 93% in room air. At 6 hours of admission, 70% required supplemental oxygen  
186 and oxygen supplementation resolved by 180 hours in 98% of cases. The need for oxygen  
187 supplementation was the final determinant for hospitalization in 58 patients (57%), and the  
188 average lag time, after all other issues had resolved except for oxygen supplementation was 66  
189 hours (2.75 days). Feeding problems were the final determinant in 27 (26%) infants and feeding  
190 and oxygen problems resolved simultaneous in 13 (13%) infants.

191 Shroeder et al. found that in a cohort of 62 infants hospitalized with bronchiolitis on continuous  
192 oxygen saturation monitoring, 26% (n=16) continued to be hospitalized only for the purposes of  
193 oxygen supplementation after they were feeding well and had no respiratory distress or frequent

194 need for bronchodilators.<sup>26</sup> Length of stay was prolonged an average of 1.6 days (range 1.1-2.0  
195 days) per hospitalization for these 16 patients.

196 McCulloh et al. conducted a trial (n=161) comparing intermittent vs. continuous pulse oximetry  
197 for nonhypoxemic infants hospitalized for bronchiolitis.<sup>27</sup> All infants were placed on continuous  
198 monitoring. Infants randomized to intermittent monitoring were only switched after the infants  
199 were nonhypoxemic. Length of stay was measured from the time of admission (not from the time  
200 of implementation of the intervention) and did not differ based on the oxygen saturation  
201 monitoring strategy (48.9 hours for continuous monitoring vs. 46.2 hours for intermittent  
202 monitoring; P=0.77). Several limitations of this trial include: only inclusion of nonhypoxemic  
203 infants for intermittent monitoring; an underpowered study (powered to detect an 18-hour  
204 difference in LOS); and measurement of the primary outcome before randomization. An expert  
205 commentary highlighted the need for further trials, specifically highlighting our pilot RCT which  
206 included infants with stable modest hypoxia.<sup>28</sup>

207 The two small patient based observational studies described above suggest that a significant  
208 portion of infants hospitalized with bronchiolitis, stabilized after the initial acute presentation of  
209 their illness, are well and ready for discharge except for the need for supplemental oxygen. *This*  
210 *has led experts to hypothesize that the easy availability of continuous oxygen saturation*  
211 *monitoring has led to an overuse of oxygen supplementation, and greater duration of*  
212 *hospitalization for infants with bronchiolitis.*<sup>3,4, 25,26,28-,31</sup> The one RCT suggests that intermittent  
213 oxygen saturation maybe considered in the management of infants who are nonhypoxemic.<sup>27</sup>  
214 However, these studies have methodologic limitations and higher quality evidence is needed to  
215 determine the best strategy for oxygen saturation monitoring and influence practice change.

216 **The link between oxygen saturation monitoring practice, oxygen supplementation and**  
217 **length of hospital stay:** Why would the use of continuous as compared with intermittent oxygen  
218 saturation monitoring lead to inappropriate oxygen supplementation and prolonged length of stay  
219 in stable infants hospitalized with bronchiolitis? Transient or persistent low oxygen saturation  
220 readings during the stable phase of hospitalization can be due to several reasons: (1) false  
221 positive detection due to issues such as motion artifacts, poor perfusion, skin pigmentation and  
222 probe positioning or (2) true positive detection due to ventilation-perfusion mismatch or a  
223 normal finding that healthy infants might otherwise experience (in the situation of transient low  
224 oxygen saturation levels).<sup>18</sup> The clinician's response to a false positive detection or a true  
225 positive detection that has little clinical consequence is often to institute or increase supplemental  
226 oxygen. This, in turn, leads to a period of further observation while receiving the increased  
227 supplemental oxygen and then a trial of oxygen supplementation weaning. With the use of  
228 continuous as compared with intermittent oxygen saturation monitoring there is a higher chance  
229 of detecting and responding to false positive readings and clinically insignificant true positive  
230 readings. The use of the continuous monitoring can lead clinicians (and families) to focus on the  
231 monitoring devices rather than the clinical assessment.<sup>31</sup> It leads to a cycle of unnecessary  
232 intervention based on a clinically insignificant low oxygen saturation reading in an otherwise  
233 stable infant. Thus, experts have postulated that the use of continuous oxygen saturation  
234 monitoring after clinical stabilization has lead to inappropriate oxygen supplementation and  
235 prolonged length of hospitalization.<sup>1,3,4,31</sup> *It is important to emphasize that the clinical context*  
236 *here is of otherwise healthy, stable hospitalized infants.* Even if on intermittent monitoring, these  
237 infants receive regular clinical assessments and oxygen saturation monitoring every 4 hours, so  
238 that any important change in their clinical status will be detected.

239 **Clinical equipoise around the optimal strategy for oxygen saturation monitoring in stable,**  
240 **otherwise healthy infants with bronchiolitis is evident from the strength of**  
241 **recommendations in national and local practice guidelines, our pilot RCT, and current**  
242 **practice patterns:** The recent AAP bronchiolitis guidelines<sup>1</sup> (2014) have recommended  
243 “clinicians may choose not to use continuous pulse oximetry for infants and children with a  
244 diagnosis of bronchiolitis”. The CPS bronchiolitis guidelines (2014) state that “the issue of  
245 continuous versus intermittent monitoring of oxygen saturation is controversial. Continuous  
246 saturation monitoring may be indicated for high-risk children in the acute phase of illness, and  
247 intermittent monitoring or spot checks are appropriate for lower-risk children and patients who  
248 are improving clinically”.<sup>12</sup> These are graded as ‘weak’ recommendations based on the few  
249 observational studies and expert opinion (evidence level D).

250 We conducted an internal pilot RCT (n=33) at SickKids comparing intermittent vs. continuous  
251 oxygen saturation monitoring in infants hospitalized with bronchiolitis and this received  
252 approval from the SickKids research ethics board (REB File No. 1000029983). There were no  
253 ethical concerns on the basis of an absence of clinical equipoise. Furthermore, we experienced  
254 great enthusiasm from clinicians (nurses and physicians) to refer their patients to the pilot RCT  
255 (70% recruitment rate). Nurses and physicians also adhered to the allocated arm (no  
256 contamination).

257 Discussion within the field of Pediatric Hospital Medicine through the CPS, AAP, Pediatric  
258 Research in Inpatient Settings network, and the study sites suggests that there is variability in the  
259 oxygen monitoring strategy used. Infants are usually started on continuous oxygen saturation  
260 monitoring. Some infants are transitioned to intermittent oxygen monitoring when they are  
261 clinically stable, however, continuous oxygen saturation is most commonly used throughout the  
262 hospital stay despite the rarity of poor outcomes. This is likely related to a practice culture of  
263 reliance on technology over clinical assessment. This practice culture is evident from the results  
264 of a RCT conducted by two senior investigators from our research team and published in *JAMA*  
265 (2014).<sup>32</sup> The RCT found that among infants presenting to an Emergency Department (ED) with  
266 mild to moderate bronchiolitis, those with an artificially elevated pulse oximetry reading were  
267 less likely to be hospitalized or receive active care than those with unaltered oximetry readings  
268 despite the same clinical status. An accompanying editorial stated that ‘it is now clear that the  
269 oxygen saturation reading can influence decision making in ways that many clinicians have  
270 thought likely – overreliance on physiologic information of uncertain importance derived from a  
271 medical device’.<sup>33</sup> *Well designed pragmatic RCTs that compare intermittent vs. continuous*  
272 *oxygen saturation monitoring in stable, otherwise healthy infants hospitalized with bronchiolitis*  
273 *are needed to close the evidence gap, change culture and effect practice change.*

274 **Alarm fatigue and overdiagnosis with continuous monitoring:** Two broad concerns around  
275 health care delivery raise further concerns around the use of continuous oxygen saturation  
276 monitoring in stable, low-risk infants hospitalized with bronchiolitis. One is a concern of the  
277 widespread overuse of physiologic monitoring devices and alarms in hospital care, the resulting  
278 alarm fatigue of staff, and the potential to compromise patient safety.<sup>34</sup> Second is a concern  
279 around overdiagnosis, the detection of an abnormality that does not benefit the patient, and how  
280 it may be harming children. A recent review on overdiagnosis highlighted the detection of  
281 clinically insignificant desaturations using continuous oxygen monitoring in bronchiolitis as an  
282 example of overdiagnosis in children.<sup>35</sup>

283 **Feasibility of a bronchiolitis oxygen monitoring trial:** *We have demonstrated feasibility of a*  
284 *pragmatic RCT comparing intermittent vs. continuous oxygen saturation monitoring in stable*



285 *infants hospitalized with bronchiolitis* by successfully conducting an internal pilot RCT with  
286 institutional funding (ClinicalTrials.gov NCT01646606). We established study procedures,  
287 created data collection and consent forms; obtained SickKids ethics approval; obtained support  
288 and input on the protocol from stakeholders (administration, quality improvement leaders,  
289 nursing, physicians, respiratory therapy), and presented the proposed work to knowledge users in  
290 Canada and the US. Infants (n=33; mean age: 5 months) were randomized to intermittent or  
291 continuous monitoring and all primary and secondary outcomes measured. The results of the  
292 internal pilot RCT demonstrated feasibility of the trial processes including: ascertainment of  
293 patients, clinicians and family enthusiasm to participate (70% recruitment rate); all patients  
294 receiving the allocated intervention with *no contamination*; no discontinuation of the  
295 intervention in any cases; adequacy of data collection procedures, no loss to follow-up; no  
296 adverse events occurred and no infants required PICU admission.

297

## 298 **OVERALL GOALS**

299 To advance health care and outcomes for hospitalized infants with bronchiolitis using patient  
300 oriented pragmatic trials as an embedded knowledge translation approach. To launch a Pediatric  
301 Hospital Research Network focusing on highly prevalent and cumulatively expensive conditions.

## 302 **OBJECTIVES**

303 **Primary:** To determine if *intermittent vs continuous* oxygen saturation monitoring will reduce  
304 length of hospital stay in hospitalized infants with bronchiolitis.

305 **Secondary:** To determine differences in other outcomes related to effectiveness, safety,  
306 acceptability, and cost.

307

## 308 **METHODS**

### 309 **TRIAL DESIGN**

310 This will be a six centre, pragmatic randomized controlled superiority trial designed with two  
311 parallel groups with a 1:1 allocation ratio with enrollment occurring over bronchiolitis seasons,  
312 November to May (Fig 1). Pragmatic trials seek to understand whether an intervention works  
313 under usual conditions.<sup>36</sup> This protocol follows SPIRIT guidelines<sup>37</sup> and was successfully  
314 implemented in a pilot RCT at SickKids demonstrating trial feasibility.

### 315 **Participants, interventions, and outcomes**

316 **Study Setting:** Six Ontario hospitals: SickKids; CHEO, McMaster Children's Hospital; Trillium  
317 Health Partners, Credit Valley Site, Mississauga, Lakeridge Health, and North York General  
318 Hospital (NYGH) on the General Pediatric Inpatient Units (GPIU).

319 **Eligibility Criteria:** Children admitted to the GPIU with bronchiolitis will be eligible if their  
320 clinical status is stable and not at high risk of deterioration.

### 321 **Inclusion**

- 322 • Clinical diagnosis of bronchiolitis as determined by the attending physician and as defined by  
323 the American Academy of Pediatrics (AAP) clinical practice guidelines (CPG)<sup>1</sup>: a preceding  
324 viral upper respiratory infection and increased respiratory effort.
- 325 • First episode of acute bronchiolitis. Infants with recurrent episodes may have an alternate  
326 diagnosis such as asthma.
- 327 • Age: 4 weeks to 24 months. Infants less than 4 weeks are at higher risk for requiring care in  
328 the PICU.

- 329 • Stable Clinical Status:
- 330 ○ For infants receiving oxygen, clinical status must be stable for 6 hours on the GPIU as
- 331 defined by all: Stable or decreasing requirement for supplemental oxygen AND a
- 332 stable or decreasing respiratory rate on at least two measurements; Respiratory rate
- 333 <70 breaths/minute; Heart Rate <180 beats/minute; Oxygen supplementation <40%
- 334 FiO<sub>2</sub> or <2 L/min by nasal prongs; not on heated high flow oxygen at time of
- 335 enrollment.
- 336 ○ For infants in room air (i.e. no supplemental oxygen), clinical status must be stable
- 337 (as defined above) for 6 hours and can be assessed from the first vital signs measured
- 338 in the emergency department.

- 339 • Parent consent

340 **Exclusion**

- 341 • known risk factors for clinical deterioration including:
- 342 ○ chronic medical condition: congenital heart disease that is cyanotic, hemodynamically
- 343 significant requiring diuretics, and/or with pulmonary hypertension; chronic lung
- 344 disease with home oxygen requirement and/or pulmonary hypertension;
- 345 neuromuscular disease; immunodeficiency; hemoglobinopathy
- 346 ○ premature birth (<35weeks)
- 347 ○ history of apnea
- 348 ○ weight < 4kg
- 349 ○ receiving morphine infusions
- 350 • patient on heated high flow oxygen at time of enrollment
- 351 • ICU admission on current admission requiring mechanical or non-invasive ventilation
- 352 • No telephone available

353 **Recruitment Strategy and Baseline Measurements:** Research Assistants (RA) will assess

354 children for eligibility 5 days a week (Monday to Friday) between 0800 and 1800. Recruitment

355 on Saturday and Sunday is permitted if feasible. We will implement the intervention during

356 daytime hours to simulate anticipated practice. Baseline characteristics and covariates, including

357 those known to be associated with the length of stay will be collected prior to randomization:

358 age, sex, history of atopy, parental cigarette smoking, treatments prior to randomization

359 (antibiotics, salbutamol, nebulized epinephrine, steroids, intravenous fluids, nasogastric feeds),

360 feeding adequacy, oxygen supplementation and respiratory rate at time of randomization, and

361 duration from hospital admission to randomization.

362

363 **Interventions**

364 For children in both groups, the pulse oximetry probe will be attached to the participant (e.g. toe,

365 finger) continuously. The target oxygen saturation for oxygen supplementation will be the same

366 for both groups at sites - 90%. Sites that also permit an acceptable oxygen saturation of greater  
367 than or equal to 88% while children are asleep (as indicated in their bronchiolitis CPG, order  
368 sets, or usual practice) will continue with that practice, in keeping with a pragmatic trial. The  
369 target oxygen saturations are based on recommendations from local CPGs (e.g. SickKids),  
370 national guidelines and a recent study.<sup>1,24</sup>

371 **Intermittent oxygen saturation monitoring group:** Oxygen saturation and vital signs will be  
372 measured intermittently at a frequency of every 4 hours by the bedside nurse through the child's  
373 hospital stay until discharge. The nurse will attach the probe to the electrical cord, which is  
374 connected to the monitor. For each measurement, the duration of monitoring will be for a  
375 minimum of 2 minutes and until a steady wave form is present on the oxygen saturation monitor,  
376 indicating a reliable measurement. The nurse will document the reading during the period. The  
377 nurse will detach the probe from the electrical cord, leaving the probe attached to the child.  
378 Hence, the child's probe will be attached to the electrical cord intermittently as well. Weaning of  
379 oxygen will be at the discretion of the attending physicians and nurses and may occur at the 4  
380 hourly time interval; oxygen weaning may also occur at other times. If supplemental oxygen is  
381 reduced, monitoring will be for 10 minutes and then discontinued if stable until the next 4 hourly  
382 measurement.

383 **Continuous oxygen saturation monitoring group:** Oxygen saturation will be measured  
384 continuously through the child's hospital stay until discharge. The reading will be displayed on  
385 the bedside monitor in the participants' room. The oxygen saturation level at which an alarm will  
386 ring will be set at 89%. Every 4 hours the nurse will complete and document a set of vital sign  
387 measurements, including oxygen saturation level. At the completion of vital signs measurement,  
388 the nurse will not detach the electrical cord from the probe. Hence, the child's probe will be  
389 attached to the electrical cord continuously as well. Weaning of oxygen will be as usual practice  
390 and will be left to the discretion of the attending physicians and nurses.

#### 391 **Procedures for modifying allocated intervention**

392 In our pilot RCT, no modifications to the allocated intervention occurred. However, the  
393 following criteria will be available for converting the group allocation of intermittent monitoring  
394 to continuous monitoring: severe tachypnea, tachycardia, apnea, clinical deterioration as assessed  
395 by the attending medical team. The infant will be converted back to intermittent monitoring  
396 when deemed clinically stable by the attending medical team.

#### 397 **Concomitant care permitted or prohibited**

398 Infants at all sites will receive concomitant bronchiolitis care as outlined in a standard care map  
399 (Appendix 1). The standard care map is based on site local clinical practice guidelines.

#### 400 **Outcomes**

##### 401 **Primary outcome**

402 **Length of Hospital Stay from randomization on the inpatient unit to discharge from**  
403 **hospital (hours):** Length of hospital stay was chosen as the primary outcome as it represents a  
404 clinically meaningful outcome in the context of this acute illness for families and clinicians.<sup>3</sup> It  
405 is important to hospital administrators and the health care system as hospital stay accounts for a  
406 major portion of bronchiolitis associated costs.<sup>11</sup> Length of stay has been used as the primary  
407 outcome in inpatient bronchiolitis trials.<sup>39,40</sup>

##### 408 **Secondary outcomes**

409 **Duration of oxygen supplementation from randomization to discontinuation of**  
410 **supplementation (hours)** will be measured from the medical record.

411 **Medical interventions:** performed from time of randomization to discharge: (a) Chest x-ray  
412 (yes/no) (b) Blood samples drawn (yes/no) and number (c) Nasopharyngeal tests for viruses  
413 (yes/no) (d) Blood culture (yes/no) (e) Bronchodilator treatments used (yes/no) and number (f)  
414 steroid administration (yes/no) (g) Nasal passage (or deeper) suctioned (yes/no) and number (h)  
415 oxygen supplementation initiated (yes/no) (i) IV fluids initiated (yes/no) and duration (j)  
416 nasogastric feeds initiated (yes/no) and duration

417 **Time from randomization to meeting discharge criteria (hours):** This will be assessed twice  
418 daily (9 am and 4pm) by a RA and defined as: no fever (temperature  $<38^{\circ}\text{C}$ ), no supplemental  
419 oxygen, normal respiratory rate for age [using the World Health Organization age-specific  
420 criteria ( $<50$  breaths/min for 2-12 months,  $<40$  breaths/min for 1 to 5 years)], and adequate  
421 feeding [defined as a feeding adequacy score of  $\geq 7$  on a 10 cm visual analogue scale (VAS)  
422 feeding adequacy scale].

423 **Length of Hospital Stay from admission to the GPIU:** This will be defined as the length of  
424 time (measured in hours) from physical admission on the GPIU to discharge from hospital. This  
425 has been chosen as a secondary outcome and not a primary outcome as the length of time from  
426 admission to the GPIU until randomization will not be influenced by the intervention.  
427

428 **Parent anxiety:** Parents will rate their level of anxiety at the current time (state anxiety) every  
429 24 hours and generally (trait anxiety) at baseline from the adult State Trait Anxiety Inventory.<sup>41</sup>  
430

431 **Number of parent work days missed from randomization to 15 days after discharge:** The  
432 RA will conduct telephone follow-up with the parent.

433 **Nursing satisfaction:** The attending nurse will be asked to complete a 10 mm visual analogue  
434 scale (VAS) to measure their satisfaction with the quality of monitoring for each participant  
435 twice daily (one by the day nurse and one by the night nurse).

436 **PICU admission and consultation after randomization.**

437 **Unscheduled return to care within 15 days of discharge:** The electronic medical record will  
438 also be reviewed to determine any emergency department visits and any admissions to hospital  
439 within 15 days of discharge. Parents will be phoned after discharge to record the number of  
440 unscheduled visits to a physician's or primary care office within 15 days of discharge. Fifteen  
441 days after discharge represents approximately 23 days from onset of symptoms and will capture  
442 the range of duration of symptoms for bronchiolitis.<sup>42</sup>

443 **Mortality:** We will include mortality from any cause during the hospitalization and up to 15  
444 days from discharge.

445 **Cost-Effectiveness:** We will perform a cost-effectiveness analysis (CEA) to determine the  
446 incremental costs (or savings) of intermittent compared to continuous oxygen saturation  
447 monitoring per change in hospital length of stay (in hours). We will take both a health care  
448 system and societal perspective. As there is no anticipated difference in long-term clinical  
449 outcomes from this condition or the intervention, our time horizon will be from admission to 15  
450 days post discharge.<sup>42</sup> All costs, parameter estimates and ranges will be derived from study data.  
451 Standardized methods for the conduct of health economic evaluations (published by CADTH)  
452 will be followed.

453 **Adherence to assigned intervention group:** Adherence rate (proportion) and reasons for  
454 modifications will be reported for each group.

455 **Data Collection Timeline**

456 Data will be collected at baseline, during the hospital stay, and then by phone after 15 days post-  
457 discharge.

#### 458 **Assignment of Interventions**

459 **Allocation:** The allocation sequence will be generated using computer-generated random  
460 numbers by the trial biostatistician. Randomization will be stratified by centre. An allocation  
461 ratio of 1:1 with random permuted blocks of varying size will be used within centre. Allocation  
462 concealment will be achieved by using a central randomization system using the REDCap  
463 randomization module. The site RA will confirm eligibility and obtain consent; then they will  
464 obtain the participant group assignment through the REDCap application. An instruction sheet  
465 for the assigned oxygen monitoring group for the attending nurse will be placed on the child's  
466 nursing flow sheet clipboard.

467 **Blinding:** Statisticians and investigators will be blind to the group allocation during the data  
468 analysis. Parents, attending nurses, physicians and research personnel involved with data  
469 collection will not be blinded to the group allocation. It is important that the clinicians receive  
470 the allocated monitoring strategy with fidelity (e.g. are aware that monitoring is intermittent and  
471 that they will not receive saturation readings more frequently) as we are interested in determining  
472 if the oxygen monitoring strategy affects their behaviour and management decisions. By taking  
473 this pragmatic approach, our estimates of effectiveness will be more applicable to usual care  
474 settings.<sup>36,45</sup>

475

#### 476 **Data collection, management, and analysis**

477 **Data Collection Methods:** The RAs will be embedded in each inpatient unit and will collect  
478 data.

479 **Health Service Utilization and Cost Data:** At the end of the trial, decision support at each of  
480 the study sites will provide individual case-costing for each participant's hospitalization for the  
481 index admission. Direct out-of-pocket costs of caregivers/parents and productivity losses will be  
482 obtained directly from study participants. A custom data collection form has been developed to  
483 measure these costs and losses upon discharge. It will be administered to participants in both  
484 arms of the trial and can be self-administered or collected via interview with the RA. Any  
485 additional health care utilization, out-of-pocket expenses and productivity losses incurred in the  
486 15 days after discharge will be obtained by the RA at the follow up call.

487 **Data Management:** OCHSU at SickKids and CHEO (oschu.ca) will serve as the trials and data  
488 management centre. RedCAP software will be used for data management.

#### 489 **Statistical methods**

490 **Sample size and recruitment duration:** The primary outcome is length of hospital stay from time  
491 of randomization on the GPIU to discharge. Assuming a median length of hospital stay from  
492 randomization to discharge of 36 hours (from pilot data, published trials), a type 1 error rate of  
493 0.05 (2 sided), power (1- $\beta$ ) of 90%, 105 subjects per group is needed to detect a clinically  
494 significant difference of 12 hours. There will be no adjustment due to loss to follow-up as this  
495 outcome is assessed in hospital. We believe that a 12 hr difference between treatment groups is a  
496 clinically meaningful difference, based on consensus with our research team, hospital  
497 administrators, and clinical experts.

498 Based on administrative data there are approximately 415 bronchiolitis admissions per  
499 year in total at the 6 sites. Approximately 40% will not meet the eligibility criteria and of these  
500 30% will not be recruited due to off-season presentation (May to November) or missed, leaving  
501 174 admissions. Assuming a conservative recruitment rate of 70% (based on pilot study), we

502 expect approximately 120 recruited patients per season. Thus, two 6 month seasons, each from  
503 mid November to mid May, will be needed at a minimum to recruit the 210 subjects. This  
504 seasonal definition of November to May will capture the peak months of respiratory viral  
505 infections responsible for bronchiolitis.<sup>47</sup> If the target sample size is reached before the end of a  
506 season, the PI in consultation with the trial biostatistician, Co-Is, and site PIs, may decide to  
507 continue the trial beyond the target of 210 patients until the end of the season. This will increase  
508 the power of the trial with minimal additional costs. This seasonal definition of November to  
509 May will capture the peak months of respiratory viral infections responsible for bronchiolitis.<sup>47</sup>

#### 510 **Statistical Analysis**

511 **Primary Outcome:** Data will be analyzed according to intention to treat principles for the  
512 primary outcome. Given that the primary and most secondary outcomes are obtained during  
513 hospitalization, and mortality is rare, it is anticipated that there will be no missing data. For the  
514 outcomes measured after discharge (readmissions and parental work days missed), outcomes  
515 with the available data and lost to follow (anticipated to be less than 5 %; there was none in the  
516 pilot RCT) will be reported.

517 The primary outcome, length of hospital stay (hours) from randomization on the inpatient  
518 unit to discharge, will be described as the ratio of the two medians with the 95% confidence  
519 intervals. Kaplan-Meier-type survival curves will be graphed for both treatment arms. Since no  
520 censoring is anticipated, the arms will be compared using a Wilcoxon rank-sum test. Since each  
521 site will follow one of two oxygen saturation targets for all their patients, as per their usual  
522 practice ( $\geq 90\%$  awake and asleep *OR*  $\geq 90\%$  awake and  $88\%$  asleep), a treatment by target  
523 interaction will be tested to see if the treatment effect differs between targets. If any clinically  
524 important imbalances exist between treatment groups, a secondary analysis of the primary  
525 outcome will be performed adjusting for the relevant baseline characteristic(s) as a covariate(s).

526 **Secondary outcomes** To control for multiple testing, the statistical level for significance for the  
527 secondary outcomes will be set to 0.005, two-sided. For the time-to-event outcomes (oxygen  
528 supplementation, discharge criteria) a Wilcoxon rank-sum test will be applied. For count data  
529 (interventions) a Poisson model will be applied. For continuous data (parent anxiety, nursing  
530 satisfaction) a normal model for repeated observations will be applied. For binary data (PICU  
531 admission, unscheduled readmission, mortality, adherence) a Fisher exact test will be applied.

#### 532 **Cost-effectiveness analysis**

533 The cost-effectiveness analysis will take both a health care system and societal perspective, with  
534 a time horizon from admission to 15 days post discharge. Costs will be adjusted for inflation and  
535 reported in 2018 Canadian dollars. Cost-effectiveness will be expressed as an incremental cost-  
536 effectiveness ratio (ICER), calculated by dividing the incremental costs between intermittent and  
537 continuous oxygen saturation monitoring by the incremental difference in hospital length of  
538 stay.<sup>43,44</sup> Extensive sensitivity analyses will be performed to evaluate the robustness of the results  
539 and evaluate uncertainty in assumptions. Deterministic one-way sensitivity analysis will be  
540 performed with all variables using ranges obtained from the 95% confidence intervals generated  
541 directly from study data. Probabilistic sensitivity analysis will also be performed to establish a  
542 point estimate and 95% confidence interval around the ICER.

#### 543 **Data Monitoring**

544 A Data Monitoring Committee was deemed not to be necessary by the SickKids research ethics  
545 board (REB) for the pilot study; as such we are not assembling one for this current protocol.  
546 There will be no interim analysis or plans for early trial termination.

#### 547 **Timelines**

548 The study will be conducted over a minimum of 5 calendar years: startup (study personnel  
549 hiring, REB applications, database development, site education); minimum three recruitment  
550 seasons including randomization and outcome assessment from November 1 - May 1, 2016-17,  
551 2017-18 and 2018-2019; and a close-out period for analysis and manuscript preparation July  
552 2019 – December 2020. We first will report the primary and secondary outcomes except for cost-  
553 effectiveness in a main paper, followed by a second paper where we will report results of the  
554 cost-effectiveness analysis.

## 555 **ETHICS**

556 **Research Ethics Approval** The study will be submitted to REB of all study sites. Study team  
557 members have completed the Tri-Council Policy Statement: Ethical Conduct for Research  
558 Involving Humans online tutorial (<http://www.pre.ethics.gc.ca/english/tutorial>).

559 **Protocol Amendments** Protocol modifications will be communicated to the REB at all sites.

560 **Consent** The research assistant who obtains informed consent will not have any direct role in  
561 clinical care of participants. The responsible physician or their delegate will first be approached  
562 by the research assistant to ascertain their eligibility for the study and permission to speak to the  
563 family. The research assistant then will review the study with the parents.

564 **Confidentiality** Confidentiality will be maintained throughout the study, in accordance with the  
565 Personal Health Information Protection Act (PHIPA). The data collection sheets will be kept in a  
566 locked file cabinet with access only given to study personnel. The key linking participant identity  
567 to study ID code will be kept separate from the data on a secure password protected network  
568 drive. The data collection sheets will be free of any identifying participant data and each  
569 participant will have a unique study ID code. The study data will be entered into the main study  
570 database through REDCap without any identifiable information and stored on a secure, network  
571 drive.

572 **Declaration of Interest** None of the study investigators have conflicts of interest to declare.

573 **Access to Data** All the study investigators will have access to the final trial data.

## 574 **CHALLENGES AND MITIGATION STRATEGIES**

575 In order to maximize patient recruitment, we are enrolling patients over three seasons, given that  
576 bronchiolitis incidence may vary by season, as tertiary hospitals see a higher proportion of  
577 infants with chronic health conditions who are not eligible for intermittent monitoring.

578 In order to mitigate challenges in trial processes, we have conducted a pilot RCT  
579 (ClinicalTrials.gov NCT01646606) comparing intermittent vs. continuous oxygen saturation  
580 monitoring (n=33; mean age: 5 months) demonstrating feasibility of trial processes including:  
581 ascertainment of patients, clinician/patient willingness to randomization (70% recruitment rate)  
582 including infants with stable modest hypoxia, all patients receiving the allocated intervention  
583 with *no contamination*, adequacy of data collection procedures, no adverse events; and  
584 estimation of the median length of stay from randomization to discharge.

585 Adherence to allocated arms was excellent in our pilot RCT. A similar, multi-faceted approach  
586 will be taken to support implementation of the multi-centre trial and adherence. Leadership  
587 support for the trial has been obtained at each site and this will be communicated to site staff.  
588 Tailored education for nurses and physicians will occur before and during the trial using a  
589 variety of methods (e.g. small group sessions, distribution of reference material including pocket  
590 cards). Key local opinion leaders for nurses and physicians have been engaged in the trial  
591 concept and design and will provide support. Research assistants and/or nurse educators at will  
592 provide one-on-one support for nurses and physicians.

## 593 **KNOWLEDGE TRANSLATION (KT)**

594 We have engaged knowledge users in the protocol development (CPS, AAP, clinicians) and  
595 network development [Ontario Provincial Council of Maternal and Child Health (PCMCH)]. End  
596 of grant KT activities will be conducted locally to clinical groups and incorporated into site  
597 CPGs; nationally, findings will be presented through webinars and meetings of the CPS and  
598 Society of Pediatric Nurses; internationally, findings will be presented at the Pediatric Academic  
599 Society and AAP Pediatric Hospital Medicine meetings, and through social media. We anticipate  
600 publication of findings in a high-impact general medical or pediatric journal. Knowledge users  
601 (CPS, AAP, PCMCH) have agreed to work with us on end of grant KT activities (e.g. clinical  
602 guidelines).

### 603 **RESEARCH TEAM EXPERTISE**

604 The research team brings together early, mid and senior clinician researchers trained in clinical  
605 epidemiology with a strong track record of Pediatric Hospital Medicine (Mahant, Pound, Parkin)  
606 and Emergency Medicine (Schuh) research, including observational research, RCTs and research  
607 networks (Mahant, Parkin, Schuh); excellence in clinical trials biostatistics and economic  
608 analysis (Willan, Moretti); a SPOR supported Pediatric clinical trials and data management unit  
609 (OSCHU) at the SickKids and CHEO Research Institute; health system and quality improvement  
610 leaders (Bayliss, Roy, Kanani, Tjahjadi); nursing practice leaders (Breen-Reid, Lavigne);  
611 established relationships across hospitals; and knowledge users and policy makers (AAP,  
612 Ralston; CPS, Friedman - bronchiolitis guideline authors). The research team will be organized  
613 into a *Scientific Oversight Team* (Mahant, Parkin, Schuh, Pound); *Data Management and*  
614 *Economics Team* (Willan, Moretti at the Ontario Child Health Support Unit); *Implementation*  
615 *Oversight Team* (Tjahjadi, Bayliss, Kanani, Breen-Reid ); *Site Leads* (CHEO: Pound; NYGH:  
616 Kanani; Trillium: Bayliss; McMaster: Wahi, Giglia; SickKids: Mahant; Lakeridge: Sakran) and  
617 *KT Oversight Team* (Mahant, Lavigne, Roy).

618



619 **REFERENCES**

620  
621

- 622 1. Ralston SL, Lieberthal AS, Meissner HC et al. American Academy of Pediatrics clinical  
623 practice guideline: The diagnosis, management and prevention of bronchiolitis. *Pediatrics*.  
624 2014; 134:e1474-e1502.
- 625 2. Simoes EA, Carbonell-Estrany X. Impact of severe disease caused by respiratory syncytial  
626 virus in children living in developed countries. *Pediatric Infectious Diseases Journal* 2003.  
627 22: S13-S20.
- 628 3. Smyth RL, Openshaw PJM. Bronchiolitis. *Lancet*. 2006;368:312-322.
- 629 4. Zorc JJ, Hall CB. Bronchiolitis: Recent evidence on diagnosis and management. *Pediatrics*  
630 2010. 125:342-349.
- 631 5. Shay DK et al. Bronchiolitis-associated hospitalization among US children, 1980-1996.  
632 *JAMA*. 1999. 282 (15): 1440-1446.
- 633 6. Wang EEL, Law BJ, Stephens D. Pediatric Investigators Collaborative Network on  
634 Infections in Canada (PICNIC) prospective study of risk factors and outcomes in patients  
635 hospitalized with respiratory syncytial viral lower respiratory tract infection. *J Pediatr*. 1995.  
636 126: 212-219.
- 637 7. Hasegawa K, Pate BM, Mansbach JM, Macias CG, Fisher ES, Piedra PA, Espinola JA,  
638 Sullivan AF, Carmargo CA. Risk factors for requiring intensive care among children  
639 admitted to ward with bronchiolitis. *Acad Pediatr*. 2015;15:77-81.
- 640 8. Hasegawa K, Tsugaa Y, Brown DFM, Mansback JM, Carmargo CA. Trends in bronchiolitis  
641 hospitalizations in the United States, 2000-2009. *Pediatrics*. 2013;132:28-36.
- 642 9. Keren R, Luan X, Localio R, Hall M, McLeaod L, Dai D, Srivastava R. Prioritization of  
643 comparative effectiveness research topics in hospital pediatrics. *Arch Pediatr Adol Med*.  
644 2012; 166:1155-1164.
- 645 10. Langley JM, LeBlanc JC, Smith B, Wang EEL. Increasing incidence of hospitalization from  
646 bronchiolitis among Canadian children, 1980-2000. *J Infect Dis*. 2003. 188: 1764-1767.
- 647 11. Langley JM, Wang EEL, Law BJ, et al. Economic evaluation of respiratory syncytial virus  
648 infection in canadian children: A pediatric investigators collaborative network on infections  
649 in canada (PICNIC) study. *J Pediatr*. 1997;131(1):113-117.
- 650 12. Friedman JN, Rieder MJ, Walton JM. Bronchiolitis: recommendations for diagnosis,  
651 monitoring and management of children one to 24 months of age. *Paediatr Child Health*.  
652 2014; 19:485-491.
- 653 13. Spurling GKP, Doust J, Del Mar CB, Eriksson L. Antibiotics for bronchiolitis in children.  
654 *Cochrane Database of Systematic Reviews*. 2011, Issue 6. Art. No.: CD005189. DOI:  
655 10.1002/14651858.CD005189.pub3.
- 656 14. Hartling L, Bialy LM, Vandermeer B, Tjosvold L, Johnson DW, Plint AC, Klassen TP, Patel  
657 H, Fernandes RM. Epinephrine for bronchiolitis. *Cochrane Database of Systematic Reviews*.  
658 2011, Issue 6. Art.No.:CD003123.DOI: 10.1002/14651858.CD003123.pub3.
- 659 15. Gadomski AM, Brower M. Bronchodilators for bronchiolitis. *Cochrane Database of*  
660 *Systematic Reviews*. 2010, Issue 12. Art. No.: CD001266. DOI:  
661 10.1002/14651858.CD001266.pub3.
- 662 16. Fernandes RM, Bialy LM, Vandermeer B, Tjosvold L, Plint AC, Patel H, Johnson DW,  
663 Klassen TP, Hartling L. Glucocorticoids for acute viral bronchiolitis in infants and young

- 664 children. *Cochrane Database of Systematic Reviews*. 2010, Issue 10. Art. No.: CD004878.  
665 DOI: 10.1002/14651858.CD004878.pub3.
- 666 17. Hartling L, Fernandes RM, Bialy L, et al. Steroids and bronchodilators for acute bronchiolitis  
667 in the first two years of life: Systematic review and meta-analysis. *BMJ*. 2011;342.
- 668 18. Fouzas S, Priftis KN, Anthracopoulos MB. Pulse oximetry in pediatric practice. *Pediatrics*.  
669 2011.
- 670 19. Mower WR, Sachs C, Nicklin EL, Baraff LJ. Pulse Oximetry as a fifth pediatric vital sign.  
671 *Pediatrics*. 1997. 99: 681-686.
- 672 20. American Thoracic Society. Cardiorespiratory sleep studies in children: establishment of  
673 normative data and polysomnographic predictors of morbidity. *Am J Respir Crit Care Med*.  
674 1999;160(4):1381–1387
- 675 21. Muzumdar H, Arens R. Diagnostic issues in pediatric obstructive sleep apnea. *Proc Am*  
676 *Thorac Soc*. 2008;5(2):263–273
- 677 22. Urschitz MS, Wolf J, Von Einem V, Urschitz-Duprat PM, Schlaud M, Poets CF. Reference  
678 values for nocturnal home pulse oximetry during sleep in primary school children. *Chest*.  
679 2003;123(1):96–101.
- 680 23. Hunt CE, Corwin MJ, Lister G, et al. Longitudinal assessment of hemoglobin oxygen  
681 saturation in healthy infants during the first 6 months of age. *J Pediatr*. 1999;135(5):580-586.
- 682 24. Cunningham S, Rodriguez A, Adams T, et al. Oxygen saturation targets in infants with  
683 bronchiolitis (BIDS): a double-blind, randomized, equivalence trial. *Lancet*. 2015;386:1041-  
684 1048.
- 685
- 686 25. Unger S, Cunningham S. Effect of oxygen supplementation on length of stay for infants  
687 hospitalized with acute viral bronchiolitis. *Pediatrics*. 2008. 121: 470-475.
- 688 26. Schroeder AR, Marmor AK, Pantell MD, Newman TB. Impact of pulse oximetry and  
689 oxygen therapy on length of stay in bronchiolitis hospitalizations. *Arch Pediatr Adol Med*.  
690 2004. 158: 527-530.
- 691 27. McCulloh R, Koster M, Ralston S et al. Use of intermittent vs. continuous pulse oximetry for  
692 nonhypoxemic infants and young children hospitalized for bronchiolitis: A randomized  
693 clinical trial. *JAMA Pediatr*. 2015;169(10):898-904.
- 694 28. Cunningham S. Intermittent monitoring of oxygen saturation in infants and children with  
695 acute bronchiolitis: Peekaboo pediatrics or good clinical care? *JAMA Pediatr*. 2015;169(10),  
696 891-892.
- 697
- 698 29. Mallory MD, Shay DK, Garrett J, Bordley WC. Bronchiolitis management preferences and  
699 the influence of pulse oximetry and respiratory rate on the decision to admit. *Pediatrics*.  
700 2003. 111: e45-e51.
- 701 30. Kini NM et al. Inpatient care for uncomplicated bronchiolitis: Comparison with Milliman  
702 and Robertson guidelines. *Arch Pediatr Adol Med*. 2001. 155: 1323-1327.
- 703 31. Bergman AB. Pulse oximetry: Good technology misapplied. *Arch of Pediatr Adol Med*.  
704 2004;158(6):594.
- 705 32. Schuh S, Freedman S, Coates A, Allen U, Parkin PC, Stephens D, Ungar W, DaSilva Z,  
706 Willan AR. Effect of oximetry on hospitalization in bronchiolitis: A randomized clinical trial.  
707 *JAMA*. 2014;312:712-718.
- 708 33. Vinci R, Bauchner H. Bronchiolitis, deception in research, and clinical decision making.  
709 *JAMA*. 2014;312:699-700.

- 710 34. Chopra V, McMahon LF. Redesigning hospital alarms for patient safety: Alarmed and  
711 potentially dangerous. *JAMA*. 2014; 311:1199-1200.
- 712 35. Coon ER, Quinonez RA, Moyer VA, Schroeder AR. Overdiagnosis: How our compulsion for  
713 diagnosis may be harming children. *Pediatrics*.2014;134:1-11.
- 714 36. Thorpe KE, Zwarenstein M, Oxman AD et al. A pragmatic–explanatory continuum indicator  
715 summary (PRECIS): a tool to help trial designers. *CMAJ*. 2009;180:E47-E57.
- 716 37. Chan A-W, Tetzlaff JM, Altman DG et al. SPIRIT 2013 Statement: Defining standard protocol items  
717 for clinical trials. *Ann Intern Med* 2013;158:200-207.
- 718 38. Smyth RL, Openshaw PJM. Bronchiolitis. *Lancet*. 2006;368:312-322.
- 719 39. Patel H, Gouin S, Platt RW. Randomized, double-blind, placebo-controlled trial of oral  
720 albuterol in infants with mild-to-moderate acute viral bronchiolitis. *J Pediatr*.  
721 2003;142(5):509-514.
- 722 40. Kuzik BA, Al Qadhi SA, Kent S, et al. Nebulized hypertonic saline in the treatment of viral  
723 bronchiolitis in infants. *J Pediatr*. 2007;151(3):266-270. e1.
- 724 41. Spielberger, C.D., Gorssuch, R.L., Lushene, P.R., Vagg, P.R., & Jacobs, G.A (1983). Manual  
725 for the State-Trait Anxiety Inventory. Consulting Psychologists Press, Inc
- 726 42. Petruzella FD, Gorelick MH. Duration of illness in infants with bronchiolitis evaluated in the  
727 emergency department. *Pediatrics*. 2010;126(2):285.
- 728 43. Ontario Case Costing Initiative. 2015. Ontario Ministry of Health and Long-Term Care.  
729 Available at <http://www.occp.com/mainPage.htm>.
- 730 44. Health Data Branch Web Portal. 2015. Ontario Ministry of Health and Long-Term Care.  
731 Available at <https://hsimi.on.ca/hdbportal/>.
- 732 45. Ware JH, Hamel MB. Pragmatic Trials – Guides to Better Care? *NEJM*. 2011. 364:1685-  
733 1687.
- 734 46. Zhang L, Mendoza-Sassi RA, Wainwright C, Klassen TP. Nebulized hypertonic saline  
735 solution for acute bronchiolitis in infants. *Cochrane Database of Systematic Reviews*. 2008,  
736 Issue 4. Art. No.: CD006458.
- 737 47. Moineddin R, Nie JX, Domb G, Leong AM, Upshur REG. Seasonality of primary care  
738 utilization of respiratory diseases in Ontario: A time-series analysis. *BMC Health Serv Res*.  
739 2008. 8:160.
- 740

741 **Figure 1. Trial Schematic**

742  
743  
744  
745  
746  
747  
748  
749  
750  
751  
752  
753  
754  
755  
756  
757  
758  
759  
760

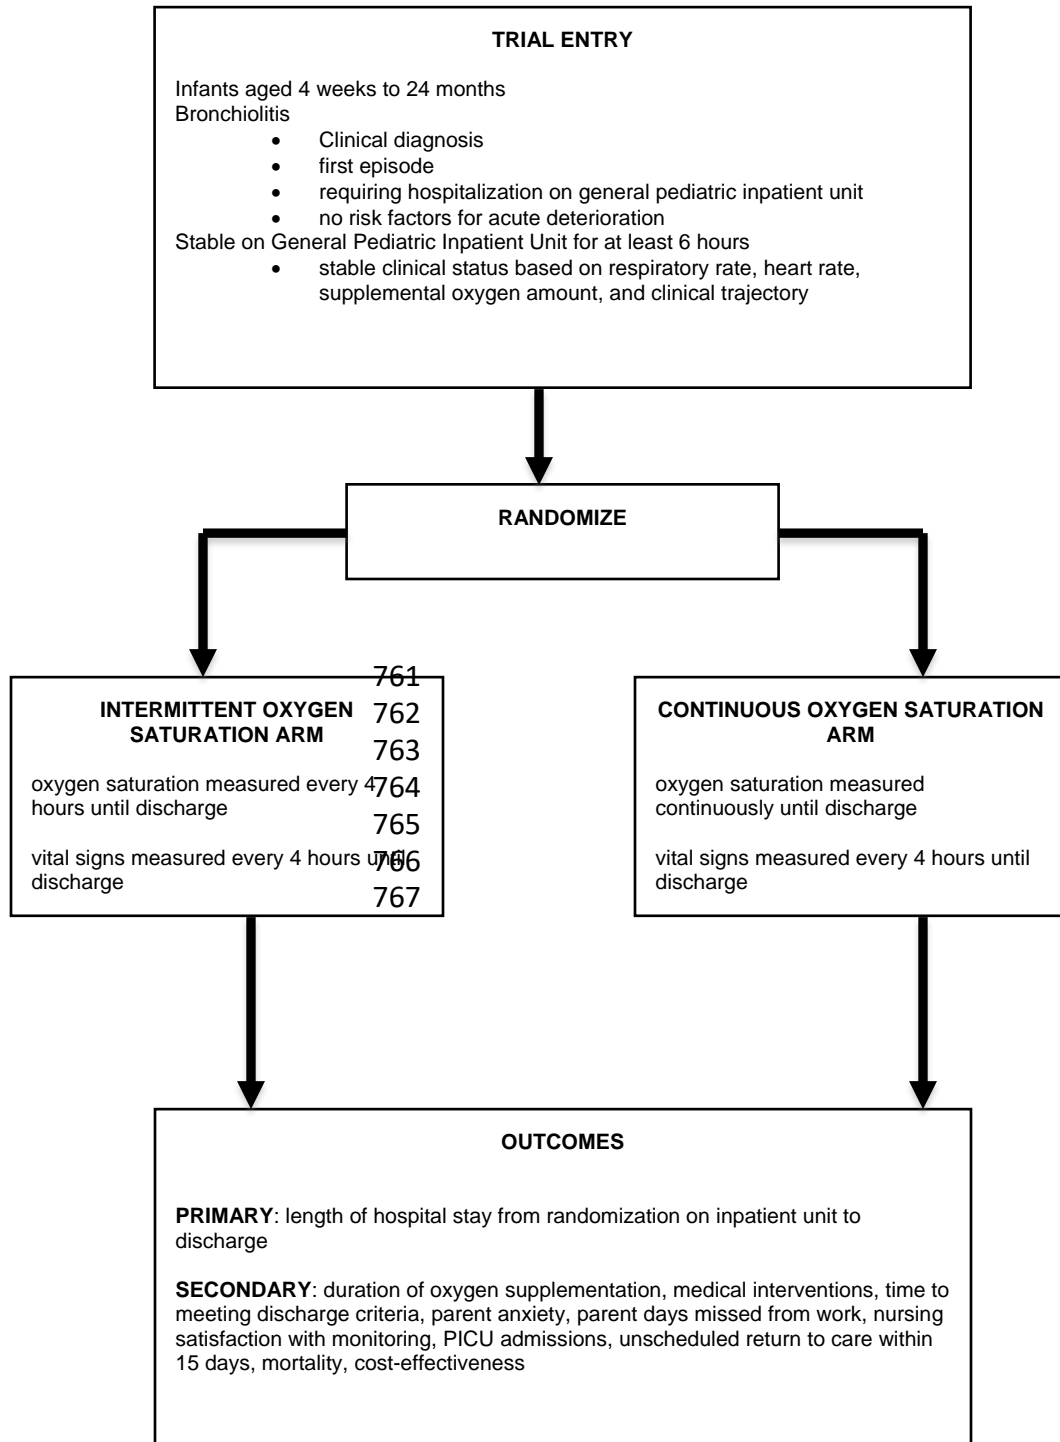

761  
762  
763  
764  
765  
766  
767  
768  
769  
770  
771  
772  
773  
774  
775  
776  
777  
778  
779  
780  
781  
782  
783  
784

785 **Appendix 1: Concomitant Care – Care Map**

786 **1.0 Assessment:** Clinical history and physical examination should be the basis for a diagnosis of  
787 bronchiolitis.

788 **2.0 Laboratory & Radiological Tests:** Routine diagnostic studies such as chest x-rays, cultures,  
789 capillary or arterial blood gases and nasopharyngeal swab for viral PCR need NOT be performed  
790 to guide clinical management, to determine viral infection status or to rule out serious bacterial  
791 infections.

792 **3.0 Management**

793 **3.1 Basic Management**

794 The basic management of typical bronchiolitis is anchored in the provision of therapies that  
795 assure that the patient is clinically stable, well oxygenated, and well hydrated. The main benefits  
796 of hospitalization of infants with acute bronchiolitis are: the careful monitoring of clinical status  
797 with frequent reassessment maintenance of a patent airway (through positioning, suctioning, and  
798 mucus clearance), maintenance of adequate hydration, oxygenation, and parental education.

799 **3.2 Oxygen** One trial found that a 90% threshold was as effective and safe as a 94% threshold. It  
800 is suggested starting supplemental oxygen when the saturation is consistently less than 90%  
801 while breathing room air.

802 **3.3 Bronchodilator** Scheduled or serial Salbutamol aerosol therapies are not recommended.

803 However, a single administration trial inhalation using epinephrine or Salbutamol may be  
804 considered as an option, particularly when there is a family history for allergy, asthma, or atopy.  
805 Inhalation therapy should not be repeated nor continued if there is no documented improvement  
806 in respiratory rate and effort between 15 to 30 minutes after a trial inhalation therapy.

807 **3.4 Antibiotics** Antibiotics should not be used in the absence of an identified bacterial focus.

808 **3.5 Respiratory Therapy** The infant should receive oral or nasal suctioning when clinically  
809 indicated. Routine respiratory care therapies should NOT be used, as they have not been found  
810 to be helpful. These include: (i) Cardiopulmonary (chest) physiotherapy (CPT) and (ii) cool mist  
811 therapy.

812 **3.6 Monitoring** Repeated clinical assessment should be conducted, as this is the most important  
813 aspect of monitoring for deteriorating respiratory status.

814 **3.8 Discharge** The interdisciplinary team should begin discharge planning on admission.

815 **Bronchiolitis Discharge Criteria Checklist**

816 - **Respiratory Status** respiratory status is consistently improving, tachypnea and increased work  
817 of breathing are improved. Oxygen saturation is in an acceptable range on room air (greater than  
818 or equal to 90%).

819

820 - **Nutritional Status** the patient is on oral feedings sufficient to prevent dehydration

821 - **Parent & Family Education on:**

- 822
- 823 • nature of illness and expected clinical course of bronchiolitis
  - 824 • to call their primary care provider or return to the ED when the following signs of  
825 worsening clinical status are observed (Parent friendly language in parentheses): (1)  
826 increasing respiratory rate and/or work of breathing as indicated by accessory muscle  
827 use (i.e. breathing very fast and/or skin sucking in around the neck or ribs with each  
828 breath) (2) inability to maintain adequate hydration (i.e. unable to feed or drink by  
829 mouth or has not had a wet diaper in more than 6 to 8 hours) (3) worsening general  
appearance (has new symptoms not present while in the hospital such as vomiting or

830 fever, looks lethargic or does not respond normally to touch or sound, change in  
831 baby's colour)  
832 • importance of handwashing before and after contact with the child to prevent spread  
833 of disease.  
834 • eliminating exposure to environmental smoking  
835 •  
836 - **Follow-up** instructions of when to follow-up with own primary care  
837 provider (generally 1-2 days)  
838

839 **Parent Anxiety:**

840 Parents rated their level of anxiety at the current time (state anxiety) every 24 hours from the  
841 adult State Trait Anxiety Inventory Please think about your own anxiety level right now. Please  
842 rate your anxiety level in the question below.

843  
844 I feel at ease (state, right now)

- 845  not at all  
846  somewhat  
847  moderately so  
848  very much so

849

850

851 **Nursing satisfaction:**

852 The attending nurse completed a 10 mm visual analogue scale (VAS) to measure their  
853 satisfaction with the quality of monitoring for each participant twice daily (one by the day nurse  
854 and one by the night nurse):

855

856 Please rate your satisfaction with the quality of the monitoring of oxygen saturation for this child  
857 on the scale below, where the left end represents not satisfied at all and the right end represents  
858 completely satisfied (mark with an 'X').

859

860

861

862

863

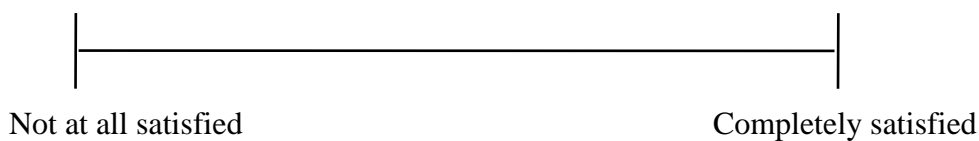

864

865

866

867 **Feeding adequacy scale:**

868

869 Please rate how well your child is feeding today on the scale below, where the left end represents  
870 not feeding at all and the right end represents feeding as well as when your child was healthy.

871

872 Please think about your child's **appetite, time spent feeding, how difficult it is and how much**  
873 **food or drink actually gets in your child's mouth.**

874

875

876

877

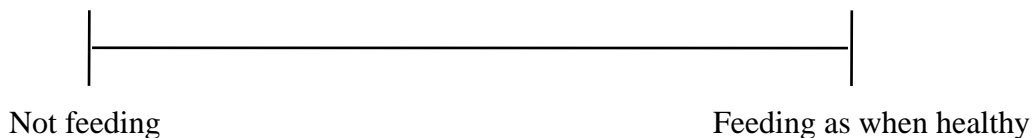

878

879

880 **Summary of Trial Protocol Changes**

881  
882  
883  
884  
885  
886  
887  
888  
889  
890  
891  
892  
893  
894  
895  
896  
897  
898  
899  
900  
901  
902  
903  
904  
905  
906  
907  
908  
909  
910  
911  
912  
913  
914  
915  
916  
917  
918  
919  
920  
921  
922  
923

1. As documented in the revised protocol version date October 13, 2016, we further specified that sites that allow for an acceptable target saturation of 88% in room air while asleep can maintain that local practice as per their hospital’s guidelines. We also revised the secondary analysis of the primary outcome for a treatment interaction from centre to target oxygen saturation. We did this as the oxygen saturation target is an important determinant of length of hospital stay in hospitalized infants with bronchiolitis.
2. As documented in the revised protocol version date January 18, 2017 we revised inclusion criteria for the minimum age of inclusion from 6 to 4 weeks of gestational age. We also revised the inclusion criteria to define the 6 hour period of stable clinical status for infants in room air to start from the first vital sign measurement in the emergency department. We further specified the exclusion criteria such that patient’s on heated high flow oxygen at time of enrollment are excluded. We also revised the exclusion criteria to allow patients admitted after the first 24 hours of admission to the GPIU.
3. As documented in the revised protocol version date January 18, 2017 we revised exclusion criteria to further specify that patients who are admitted to the ICU on the current admission who require mechanical or non-invasive ventilation are excluded from the trial.
4. As documented in the revised protocol version date March 07, 2017 we revised the secondary outcome unscheduled return care within 15 days of discharge to indicate that the electronic medical record will be used as a data source to determine emergency department visits and admissions to hospital within 15 days of discharge.
5. As documented in the revised protocol version date May 10, 2018, we revised the sample size to indicate that if the target sample of 210 was reached before the end of the bronchiolitis season then the trial investigators may continue to recruit beyond 210 patients until the end of the bronchiolitis season. This will increase the power of the trial with minimal additional costs. We also further specified secondary outcomes, to include nasopharyngeal suctioning (yes/no) in addition to the number of times; oxygen supplementation initiated (yes/no) in addition to the duration; blood tests (yes/no) in addition to the number of times.
6. As documented in the revised protocol version date January 15, 2019, we further specified the secondary analysis of the primary outcome to indicate that if any clinically important imbalances exist between treatment groups, a secondary analysis of the primary outcome will be performed adjusting for the relevant baseline characteristic as a covariate.
7. As documented in the revised protocol version date January 15, 2019, we will report the cost-effectiveness outcome in a separate paper to the main clinical paper with reports on all other primary and secondary outcomes.
8. As documented in the revised protocol version date December 5, 2019, the secondary outcome of length of hospital stay from triage in the emergency department was revised to length of hospital stay from admission to the general pediatric inpatient unit (GPIU). The latter time frame was deemed to be more clinically relevant to an inpatient trial.



924  
925  
926  
927  
928  
929  
930  
931  
932  
933  
934  
935  
936  
937  
938  
939  
940  
941  
942  
943  
944  
945  
946  
947  
948  
949  
950  
951  
952  
953  
954  
955

**Statistical Analysis Plan**

**A Randomized Trial of Intermittent vs. Continuous Oxygen Saturation Monitoring in Infants Hospitalized with Bronchiolitis**

ClinicalTrials.gov number, NCT02947204

**Statistical Analysis Plan Version:** Final. Note: ‘Final’ statistical analysis plan includes definitions and analyses that were established prior to unmasking of treatment groups in January 29, 2020. Please see summary of changes at the end of this document, which lists changes from the original statistical analysis plan and trial protocol.

**Principal Investigator**

Sanjay Mahant, MD FRCPC, Associate Scientist, Hospital for Sick Children, Department of Pediatrics, University of Toronto

**Statisticians**

Andrew R Willan, PhD, Dalla Lana School of Public Health, Ontario Child Health Support Unit, Research Institute, Hospital for Sick Children, Toronto, Ontario, Canada

Nick Barrowman, PhD, Senior Statistician, Clinical Research Institute, Children’s Hospital of Eastern Ontario Research Institute, Department of Pediatrics, University of Ottawa

Amisha Agarwal, MSc, Methodologist, Clinical Research Institute, Children’s Hospital of Eastern Ontario Research Institute

956  
957  
958  
959  
960  
961  
962  
963  
964  
965  
966  
967  
968  
969  
970  
971  
972  
973  
974  
975  
976  
977  
978  
979  
980  
981  
982  
983  
984  
985  
986  
987  
988  
989  
990  
991  
992  
993  
994  
995  
996  
997  
998  
999  
1000  
1001

## **1 Introduction**

### **1.1 Objectives**

Primary: To determine if *intermittent* vs *continuous* oxygen saturation monitoring will reduce length of hospital stay in hospitalized infants with bronchiolitis.

Secondary: To determine differences in other outcomes related to effectiveness, safety, acceptability, and cost.

## **2 Study Methods**

### **2.1 Trial Design**

This will be a six centre, pragmatic, multi-centre randomized controlled superiority trial designed with two parallel groups with a 1:1 allocation ratio with enrollment occurring over bronchiolitis seasons, November to May. Pragmatic trials seek to understand whether an intervention works under usual conditions.

### **2.2 Randomization**

The allocation sequence will be generated using computer-generated random numbers by the trial biostatistician. Randomization will be stratified by centre. An allocation ratio of 1:1 with random permuted blocks of varying size will be used. Allocation concealment will be achieved by using a central randomization system using the REDCap randomization module. The site research assistant will confirm eligibility and obtain consent; then they will obtain the participant group assignment through the REDCap application.

### **2.3 Sample Size**

The primary outcome is length of hospital stay from time of randomization on the general pediatric inpatient unit (GPIU) to discharge. Assuming a median length of hospital stay from randomization to discharge of 36 hours (from pilot data, published trials), a type 1 error rate of 0.05 (2 sided), power (1- $\beta$ ) of 90%, 105 subjects per group is needed to detect a clinically significant difference of 12 hours. There will be no adjustment due to loss to follow-up as this outcome is assessed in hospital. We believe that a 12-hour difference between treatment groups is a clinically meaningful difference, based on consensus with our research team, hospital administrators, and clinical experts.

### **2.4 Framework**

This will be a superiority trial. We will be analyzing all primary and secondary comparisons on this basis.

### **2.5 Statistical interim analysis and stopping rules**

1002  
1003 A Data Monitoring Committee was deemed not to be necessary by the SickKids research ethics  
1004 board (REB) as we are measuring two interventions which are within the standards of usual  
1005 practice. There will be no interim analysis or plans for early trial termination.  
1006

## 1007 **2.6 Timing of final analysis**

1008

1009 Analysis will only be conducted after all patients have been enrolled and follow-up completed.  
1010

## 1011 **2.7 Timing of outcome assessments**

1012

1013 The following outcomes are measured from randomization to discharge from hospital:  
1014

- 1015 1. Length of hospital stay from randomization on the inpatient unit to discharge from  
1016 hospital
  - 1017 2. Duration of oxygen supplementation from randomization to discontinuation of  
1018 supplementation
  - 1019 3. Medical interventions
  - 1020 4. Time from randomization to meeting discharge criteria
  - 1021 5. Parent Anxiety
  - 1022 6. Nursing Satisfaction
  - 1023 7. PICU admission and consultation after randomization
  - 1024 8. Adherence to the assigned intervention group
  - 1025 9. Mortality
- 1026

1027 The following outcomes are measured from admission to the GPIU to discharge from hospital:  
1028

- 1029 1. Length of hospital stay from admission to the GPIU
- 1030

1031 The following outcomes are measured from randomization to 15 days after discharge:  
1032

- 1033 1. Number of parent work days missed from randomization to 15 days after discharge
- 1034

1035 The following outcomes are measured from discharge from hospital to 15 days after discharge:  
1036

- 1036 1. Unscheduled return to care within 15 days of discharge.
- 1037

## 1038 **3 Statistical Principles**

1039

### 1040 **3.1 Confidence Intervals and P values**

1041

1042 For the primary analysis of the primary outcome, time from randomization on the inpatient unit  
1043 to discharge, a two-sided P-value of  $<0.05$  will be considered statistically significant. For all  
1044 secondary outcomes, to control for multiple testing, the statistical level for significance will be  
1045 set to 0.005, two-sided. Where appropriate, 95% confidence intervals (CI) will be presented.  
1046

### 1047 **3.2 Adherence and Protocol Deviations**

1048  
1049 Adherence rate (number and percentage) and reasons for modifications to the assigned group  
1050 (i.e. intermittent or continuous oxygen saturation monitoring) will be reported for each group.  
1051 Research staff at each site will assess twice daily whether infants are on the assigned oxygen  
1052 saturation monitoring group. Given that this is a pragmatic trial assessing two interventions that  
1053 are within the standards of usual practice, we will not consider non-adherence as a deviation in  
1054 the protocol.

### 1055 1056 **3.3 Analysis Populations**

1057  
1058 Data will be analyzed according to intention to treat principles for the primary and secondary  
1059 outcomes.

## 1060 1061 **4 Trial Population**

### 1062 1063 **4.1 Eligibility Criteria**

1064  
1065 Children admitted to the GPIU at the participating site hospitals with bronchiolitis will be  
1066 eligible if their clinical status is stable and not at high risk of deterioration.

#### 1067 1068 Inclusion

- 1069 • Clinical diagnosis of bronchiolitis as determined by the attending physician and as  
1070 defined by the American Academy of Pediatrics (AAP) clinical practice guidelines  
1071 (CPG).
- 1072 • First episode of acute bronchiolitis.
- 1073 • Age: 4 weeks to 24 months. Infants less than 4 weeks are at higher risk for requiring  
1074 care in the PICU.
- 1075 • Stable Clinical Status:
  - 1076 ○ For infants receiving oxygen, clinical status must be stable for 6 hours on the  
1077 GPIU as defined by all: Stable or decreasing requirement for supplemental  
1078 oxygen AND a stable or decreasing respiratory rate on at least two  
1079 measurements; Respiratory rate <70 breaths/minute; Heart Rate <180  
1080 beats/minute; Oxygen supplementation <40% FiO<sub>2</sub> or <2 L/min by nasal  
1081 prongs; not on heated high flow oxygen at time of enrollment.
  - 1082 ○ For infants in room air (i.e. no supplemental oxygen), clinical status must be  
1083 stable (as defined above) for 6 hours and can be assessed from the first vital  
1084 signs measured in the emergency department.
- 1085 • Parent consent

#### 1086 1087 Exclusion

- 1088 • known risk factors for clinical deterioration including:
  - 1089 ○ chronic medical condition: congenital heart disease that is cyanotic,  
1090 hemodynamically significant requiring diuretics, and/or with pulmonary  
1091 hypertension; chronic lung disease with home oxygen requirement and/or  
1092 pulmonary hypertension; neuromuscular disease; immunodeficiency;  
1093 hemoglobinopathy

- 1094 ○ premature birth (<35weeks)
- 1095 ○ history of apnea
- 1096 ○ weight < 4kg
- 1097 ○ receiving morphine infusions
- 1098 • patient on heated high flow oxygen at time of enrollment
- 1099 • ICU admission on current admission requiring mechanical or non-invasive ventilation
- 1100 • No telephone available

1101

## 1102 **4.2 Recruitment**

1103

1104 The CONSORT flow diagram will include total number of infants admitted with bronchiolitis  
1105 who were screened, reasons for non-eligibility, the total number of eligible participants, the total  
1106 number who were approached for consent, the total number who consented and were  
1107 randomized, the number assigned to each treatment group, and the number of participants in the  
1108 primary analysis.

1109

## 1110 **4.3 Withdrawal/follow-up**

1111

1112 If any withdrawals occur, we will report them and by group. Given that this is a pragmatic trial  
1113 we will only consider withdrawals when participants (i.e. parents) ask to be withdrawn from the  
1114 study (i.e. any data removed from the trial database). Parents who request their child's assigned  
1115 monitoring group to change will be documented as non-adherence to the assigned group and will  
1116 not be considered as a withdrawal. Patients who are transferred to the PICU will not be  
1117 considered withdrawn. We will report loss to missing data due to follow-up by specific outcomes  
1118 and group.

1119

## 1120 **4.4 Baseline patient characteristics**

1121

1122 We will report the following baseline characteristics: age (months), weight (kg), female sex,  
1123 family history of asthma or personal history of atopy, parental cigarette smoking, management in  
1124 the emergency department (antibiotic, salbutamol, nebulized epinephrine, steroid, supplemental  
1125 oxygen, high flow oxygen therapy, continuous oxygen saturation monitoring, intravenous fluids,  
1126 nasogastric feeds), clinical status at randomization on the inpatient unit [respiratory rate  
1127 (breaths/min), heart rate (beats/min), oxygen saturation (%), Oxygen supplementation, and  
1128 feeding adequacy score (out of 10)], and time from physical admission on the general pediatric  
1129 inpatient unit (GPIU) to randomization (hours). For the categorical baseline characteristics, we  
1130 will report the number and percentage in each group. For the age, weight, respiratory rate, heart  
1131 rate, oxygen saturation, and time from physical admission on the GPIU to randomization we will  
1132 report the median and interquartile range for each group. For the feeding adequacy score we will  
1133 report the mean and standard deviation for each group.

1134

## 1135 **5 Analysis**

1136

### 1137 **5.1 Outcome Analysis**

1138

1139 Primary Outcome

1140  
1141 **Length of Hospital Stay from randomization on the inpatient unit to discharge from**  
1142 **hospital (hours).** This will be defined as the time from randomization on the inpatient unit until  
1143 discharge from hospital in hours. It will be abstracted from the medical records.

1144  
1145 *Primary Analysis.* The primary outcome, length of hospital stay (hours) from randomization on  
1146 the inpatient unit to discharge, will be reported as the median time in hours and interquartile  
1147 range by group. We will then estimate the ratio of the two medians with a 95% confidence  
1148 interval. We will also estimate the difference in medians between groups with a 95% confidence  
1149 interval. Kaplan-Meier-type survival curves will be graphed for both treatment arms. Since no  
1150 censoring is anticipated, the arms will be compared using a Wilcoxon rank-sum test.

1151  
1152 *Secondary Analysis.* (a) Since each site will follow one of two oxygen saturation targets for all  
1153 their patients, as per their usual practice ( $\geq 90\%$  awake and asleep *OR*  $\geq 90\%$  awake and  $88\%$   
1154 asleep), a treatment by target interaction will be tested to see if the treatment effect differs  
1155 between targets. We will conduct a survival analysis using the Cox proportional hazard model  
1156 comparing treatment groups that includes an interaction term for the target group. A two-sided  
1157 test of significance will be applied at the 5% level. (b) If any clinically important imbalances  
1158 exist between treatment groups with respect to baseline variables, a secondary analysis of the  
1159 primary outcome will be performed adjusting for the relevant baseline variables as a covariate.  
1160 We will conduct a survival analysis using the Cox proportional hazard model comparing  
1161 treatment groups (unadjusted for the baseline characteristic) and then adjusted for the baseline  
1162 characteristic. We will estimate the unadjusted and adjusted hazard ratio and 95% CI.

1163  
1164 Secondary Outcomes

1165  
1166 **Duration of oxygen supplementation from randomization to discontinuation of**  
1167 **supplementation (hours).** This will be abstracted from the medical records. We will report the  
1168 number of participants who were on supplemental oxygen at any point and stopped after  
1169 randomization in each group and the median number of hours with interquartile range on  
1170 supplemental oxygen for each group. For the median duration of oxygen supplementation, we  
1171 will estimate the ratio of medians with 95% confidence interval. The Wilcoxon rank-sum test  
1172 will be applied.

1173  
1174 **Oxygen supplementation initiated after randomization.** This is defined as the number of  
1175 participants who were not on oxygen supplementation at randomization and had oxygen  
1176 supplementation initiated after randomization. This will be abstracted from the medical records  
1177 and will be reported as the number and percentage of participants in each group who initiated  
1178 oxygen supplementation after randomization. We will estimate the odds ratio with 95% CI.  
1179 Fisher's exact test will be applied to determine statistical significance.

1180  
1181 **Medical Interventions.** This will be defined as medical interventions performed from  
1182 randomization to discharge. This will be abstracted from the medical records. For the outcomes  
1183 of chest x-ray, blood test, nasopharyngeal testing for viruses, blood culture testing,  
1184 bronchodilator treatment, systemic steroids, nasal suctioning, intravenous fluids initiated,  
1185 nasogastric fluids initiated, we will report the number and percentage of participants in each

1186 group who had the intervention. We will estimate the odds ratio with 95% CI for each  
1187 intervention. The Fisher's exact test will be applied to determine statistical significance. For the  
1188 outcomes, number of blood tests, number of bronchodilator treatments, number of nasal  
1189 suctioning we will report the median number per group and interquartile range for those  
1190 participants who received the intervention. We will estimate the ratio of medians and 95% CI.  
1191 The negative binomial model will be applied to determine statistical significance. For the  
1192 outcomes of duration of intravenous fluids (hours) and duration of nasogastric feeds (hours) from  
1193 randomization to discharge, we will report the median number of hours with interquartile range  
1194 for each group. Participants who did not receive nasogastric feeds or who received nasogastric  
1195 feeds that were discontinued prior to randomization will not be included in this analysis. We will  
1196 estimate the ratio of medians with 95% confidence interval. The Wilcoxon rank-sum test will be  
1197 applied.

1198  
1199 **Time from randomization to meeting discharge criteria (hours).** The time at which a  
1200 participant met discharge criteria will be assessed twice daily (9 am and 4pm) by a RA and  
1201 defined as: no fever (temperature  $<38^{\circ}\text{C}$ ), no supplemental oxygen, normal respiratory rate for  
1202 age [using the World Health Organization age-specific criteria ( $<50$  breaths/min for 2-12  
1203 months,  $<40$  breaths/min for 1 to 5 years)], and adequate feeding [defined as a feeding adequacy  
1204 score of  $\geq 7$  on a 10 cm visual analogue scale (VAS) feeding adequacy scale]. We will estimate  
1205 the ratio of medians with 95% confidence interval. The Wilcoxon rank-sum test will be applied.

1206  
1207 **Length of Hospital Stay from admission to the general pediatric inpatient unit (GPIU) to**  
1208 **discharge (hours).** This will be defined as the length of time (measured in hours) from physical  
1209 admission on the GPIU to discharge from hospital. We will report the median number of hours  
1210 with interquartile range for each group. We will then estimate the ratio of medians with 95%  
1211 confidence interval. The Wilcoxon rank-sum test will be applied.

1212  
1213 **Parent anxiety.** Parent anxiety will be measured after randomization using the state anxiety  
1214 scale which is a 4-point Likert scale (1= not at all at ease; 2=somewhat at ease; 3=moderate so at  
1215 ease; 4=very much so at ease). Parents will be asked to complete this scale up to once per day.  
1216 For each participant, we will first calculate the mean score across measurements from both  
1217 parents, by day (day 2 to discharge), and then calculate the mean score across all days. Then we  
1218 will report the mean score and standard deviation across all participants by group. We will  
1219 estimate the mean difference between groups with the 95% CI. The t-test will be applied to  
1220 determine statistical significance.

1221  
1222 **Number of parent work days missed from randomization to 15 days after discharge.** The  
1223 number of parent days missed from work will be measured by telephone follow-up with the  
1224 parent(s). This includes paid and unpaid employment. Parents who don't work in paid  
1225 employment and did not miss any days of unpaid work (e.g. caregiving for another child) will be  
1226 recorded as missing 0 days of work. For each participant, we will first sum the total number of  
1227 days missed from work by each parent, and then calculate the median number of days missed  
1228 from work across both parents. Then we will estimate the median number of days missed from  
1229 work and interquartile range across all participants by group. We will estimate the ratio of  
1230 medians with 95% confidence interval. The negative binomial model will be applied.

1231

1232 **Nursing satisfaction.** The attending nurse will be asked to complete a 10 mm visual analogue  
1233 scale (VAS) to measure their satisfaction with the quality of monitoring for each participant. We  
1234 will first calculate the mean VAS score across all nurses in the day and night, and then report the  
1235 mean score and standard deviation by group. We will estimate the mean difference between  
1236 groups with the 95% CI. The t-test will be applied to determine statistical significance.  
1237

1238 **PICU admission and consultation.** This will be defined as a PICU transfer after randomization  
1239 until discharge and a PICU consultation after randomization until discharge. This will be  
1240 abstracted from the medical records. We will report the number and percentage of participants in  
1241 each group who had a PICU admission and/or a PICU consultation. We will estimate the odds  
1242 ratio with 95% CI. Fisher's exact test will be applied to determine statistical significance.  
1243

1244 **Unscheduled return to care within 15 days of discharge.** The electronic medical record will  
1245 be reviewed to determine any emergency department visits and any admissions to hospital within  
1246 15 days of discharge. Parents will be phoned after discharge to record the number of unscheduled  
1247 visits to a physician's or primary care office within 15 days of discharge. We will report the  
1248 number and percentage of participants in each group who had an emergency department visit,  
1249 admission to hospital, and unscheduled visit to a physician or primary care office within 15 days  
1250 of discharge. We will estimate the odds ratio with 95% CI for each outcome separately. Fisher's  
1251 exact test will be applied to determine statistical significance.  
1252

1253 **Mortality.** We will include mortality from any cause. We will report the number and percentage  
1254 of participants who died in each group. The odds ratio with 95% CI was not reported as there  
1255 were no deaths. No statistical test was applied.  
1256

## 1257 **5.2 Missing Data**

1258

1259 We will report missing data in the results. We will not perform any multiple imputation or other  
1260 statistical methods to handle missing data.  
1261

## 1262 **5.3 Additional Analyses**

1263

1264 We will not conduct any additional analyses.  
1265

## 1266 **5.4 Harms**

1267

1268 The interventions compared in this trial are within the usual practice standards. We have  
1269 collected potential harms associated with the interventions as secondary outcomes: PICU  
1270 admission and consultation, unscheduled return visits within 15 days of discharge, and mortality.  
1271 The analysis of these outcomes is described above in the secondary outcomes analysis section.  
1272

## 1273 **5.5 Statistical Software**

1274

1275 All analyses were computed using R version 3.6.2.  
1276  
1277



1278 **5.6 References**

1279

1280 Price, R. M. and Bonett, D. G. 2002. Distribution-free confidence intervals for difference and  
1281 ratio of medians. *Journal of Statistical Computation and Simulation* 72(2): 119-124.

1282

1283 **6.0 Summary of Changes to Statistical Analysis Plan**

1284

1285 1. As documented in the revised trial protocol version date October 13, 2016 , we further

1286 specified that sites that allow for an acceptable target saturation of 88% in room air while

1287 asleep can maintain that local practice as per their hospital's guidelines. We also revised

1288 the secondary analysis of the primary outcome for a treatment interaction from centre to

1289 target oxygen saturation. We did this as the oxygen saturation target is an important

1290 determinant of length of hospital stay in hospitalized infants with bronchiolitis.

1291 2. As documented in the revised trial protocol version date May 10, 2018, we revised the

1292 sample size to indicate that if the target sample of 210 was reached before the end of the

1293 bronchiolitis season then the trial investigators may continue to recruit beyond 210

1294 patients until the end of the bronchiolitis season. This will increase the power of the trial

1295 with minimal additional costs.

1296 3. As documented in the revised trial protocol version date January 15, 2019, we further

1297 specified the secondary analysis of the primary outcome to indicate that if any clinically

1298 important imbalances exist between treatment groups, a secondary analysis of the

1299 primary outcome will be performed adjusting for the relevant baseline characteristic as a

1300 covariate.

1301 4. For the secondary outcomes of parent anxiety score and nursing satisfaction score the

1302 analysis was revised from a normal model for repeated observations to a t-test. These

1303 revisions reflected more appropriate analysis for the data.

1304 5. For the secondary outcomes which were count data (number of blood tests, number of

1305 bronchodilator treatments, number of nasal suctioning, number of parent days missed

1306 from work) the analysis was revised from a Poisson model to a negative binomial model

1307 due to over dispersion of the data.

1308 6. For the secondary outcome of mortality, the analysis was revised from estimating the

1309 odds ratio and 95% CI to not reporting the odds ratio and 95% CI as there were no

1310 mortalities. There was no statistical test applied.

1311

1312

1313

1314
