# Supplementary material
Source: PubMed Central journal article supplement (PMC7922227)
Supplement: jamapediatr-e206141-s003.pdf [file jamapediatr-e206141-s003.pdf]

## Data Sharing Statement

Mahant. Intermittent vs Continuous Pulse Oximetry in Hospitalized Infants With Stabilized Bronchiolitis. *JAMA Pediatr*. Published March 01, 2021. doi:10.1001/jamapediatrics.2020.6141

### Data

**Data available:** Yes

**Data types:** Deidentified participant data

**How to access data:** [sanjay.mahant@sickkids.ca](mailto:sanjay.mahant@sickkids.ca)

**When available:** With publication

### Supporting Documents

**Document types:** None

### Additional Information

**Who can access the data:** researchers whose proposed use of the data has been reviewed by the author and has been approved

**Types of analyses:** for any purpose of a reasonable request

**Mechanisms of data availability:** after approval of a proposal with a signed data access agreement
